# Supplementary material
Source: MDPI journal article supplement (https://www.mdpi.com/2225-1154/8/12/143)
Supplement: s1 [file s1]

# Intraseasonal precipitation variability over West Africa under 1.5 °C and 2.0 °C global warming scenarios: results from CORDEX RCM runs

## Supplementary material

### 1. RCM run performance assessment, section 3.1

Figures S1 to S6 show the model simulation rankings based on the criteria set out in sections 2.3 and 3.1.

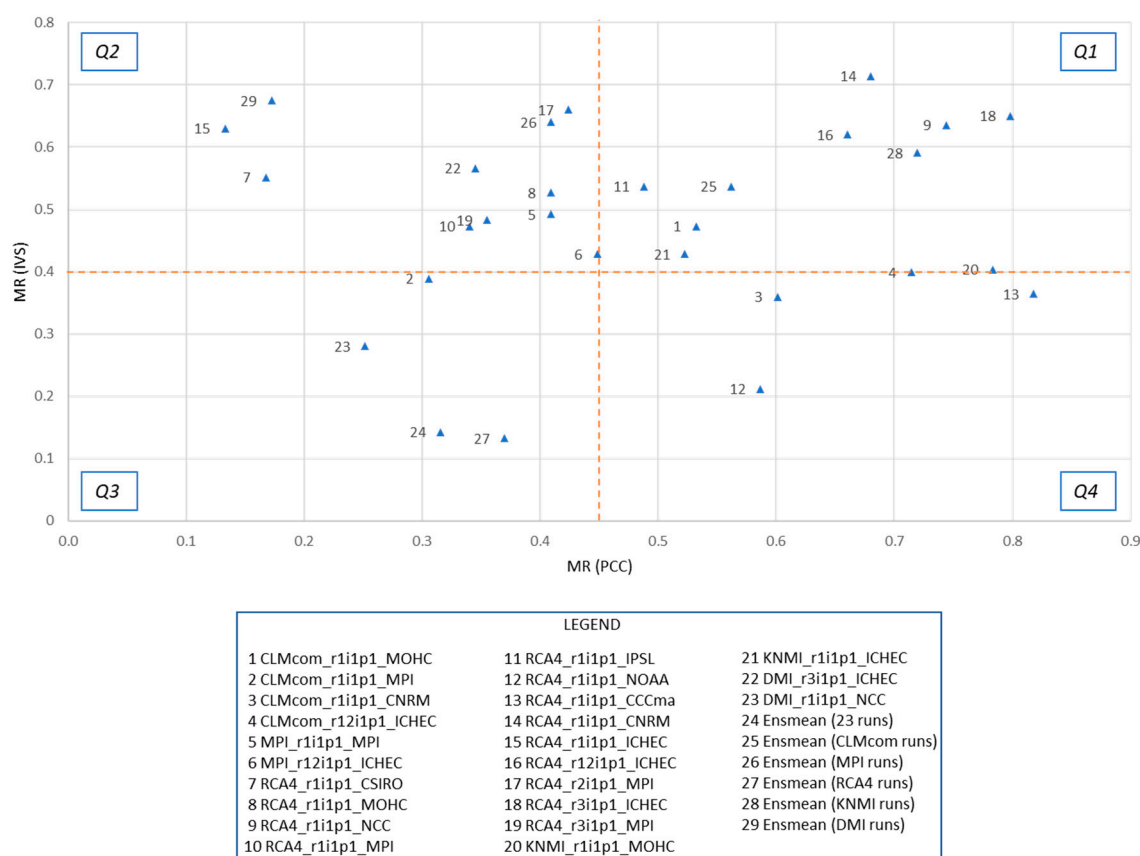

**Figure S1.** Model run ranking (relative to CHIRPS) based on correlation coefficients (PCCs) and interannual variability scores (IVS), for the WAN region.

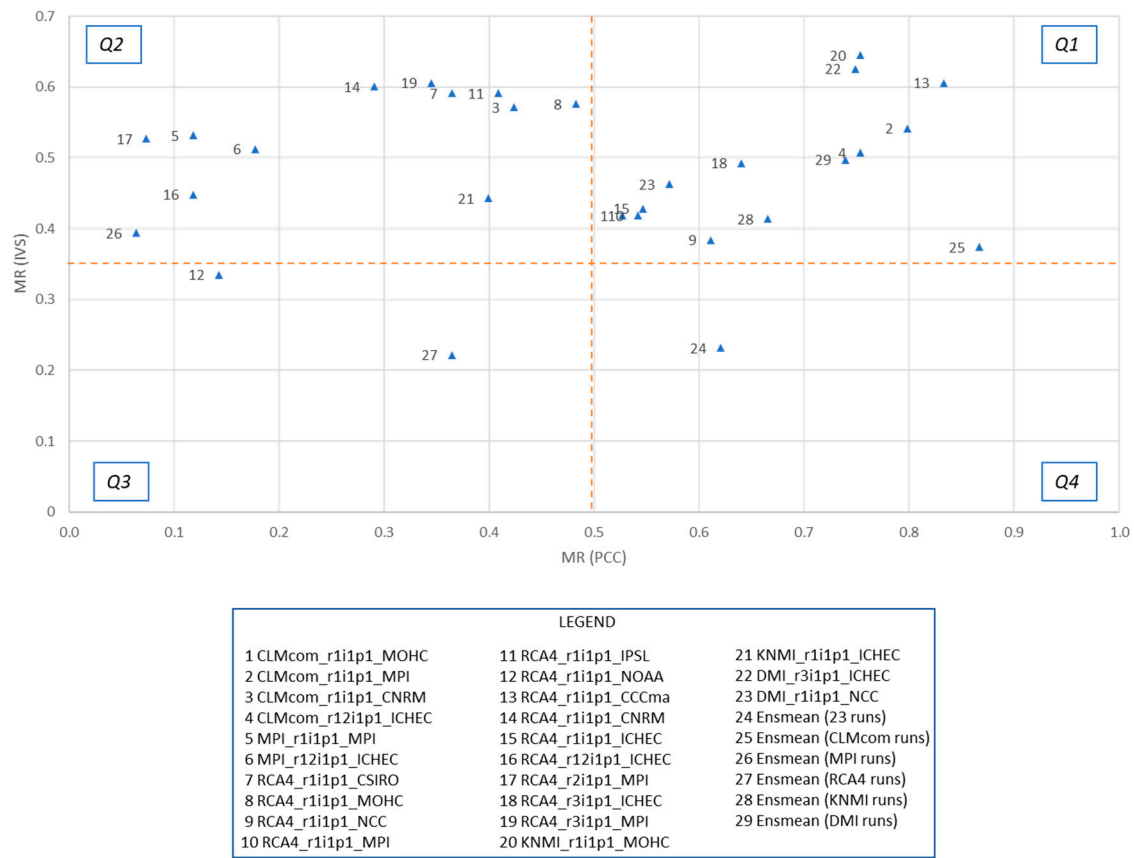

**Figure S2.** As in *Error! Reference source not found.* but for the WAS region.

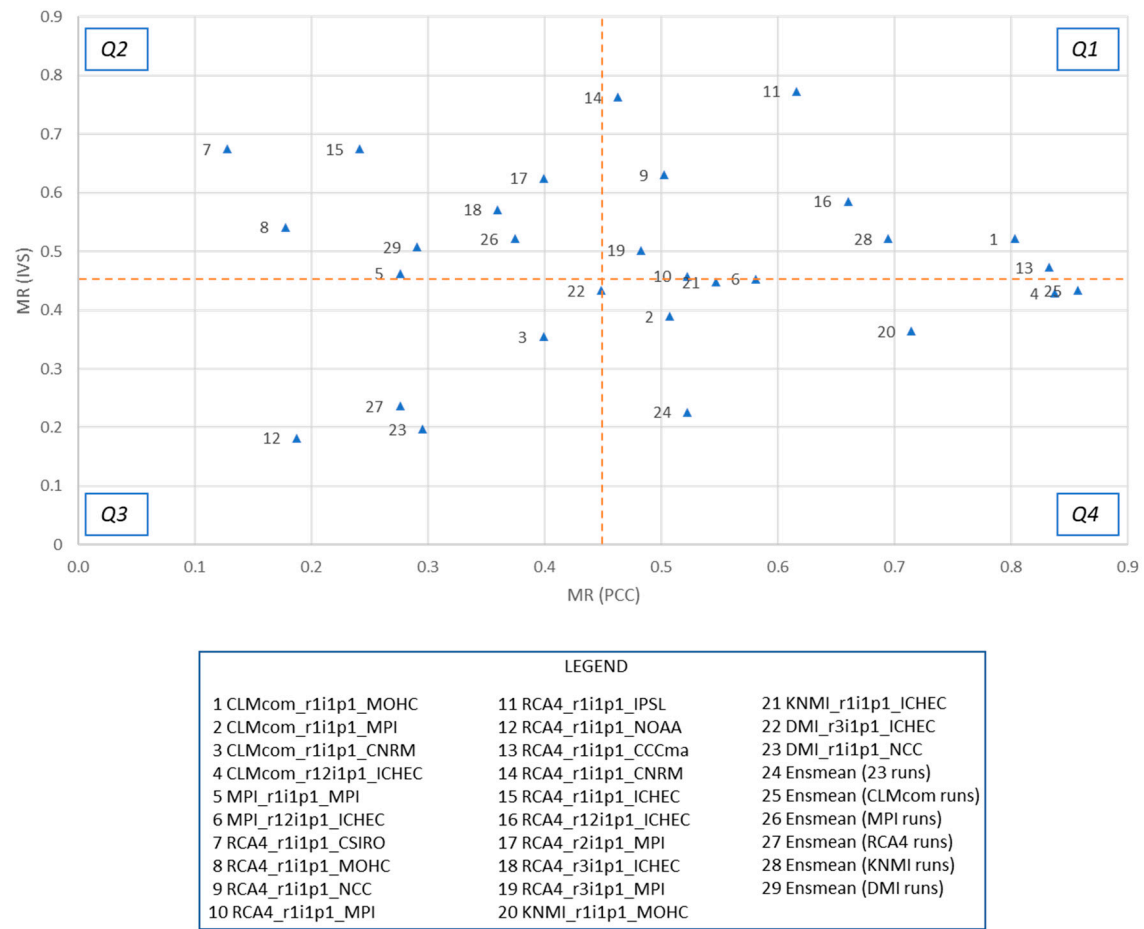

**Figure S3.** Model run ranking (relative to TAMSAT3) based on correlation coefficients (PCCs) and interannual variability scores (IVS), for the WAN region.

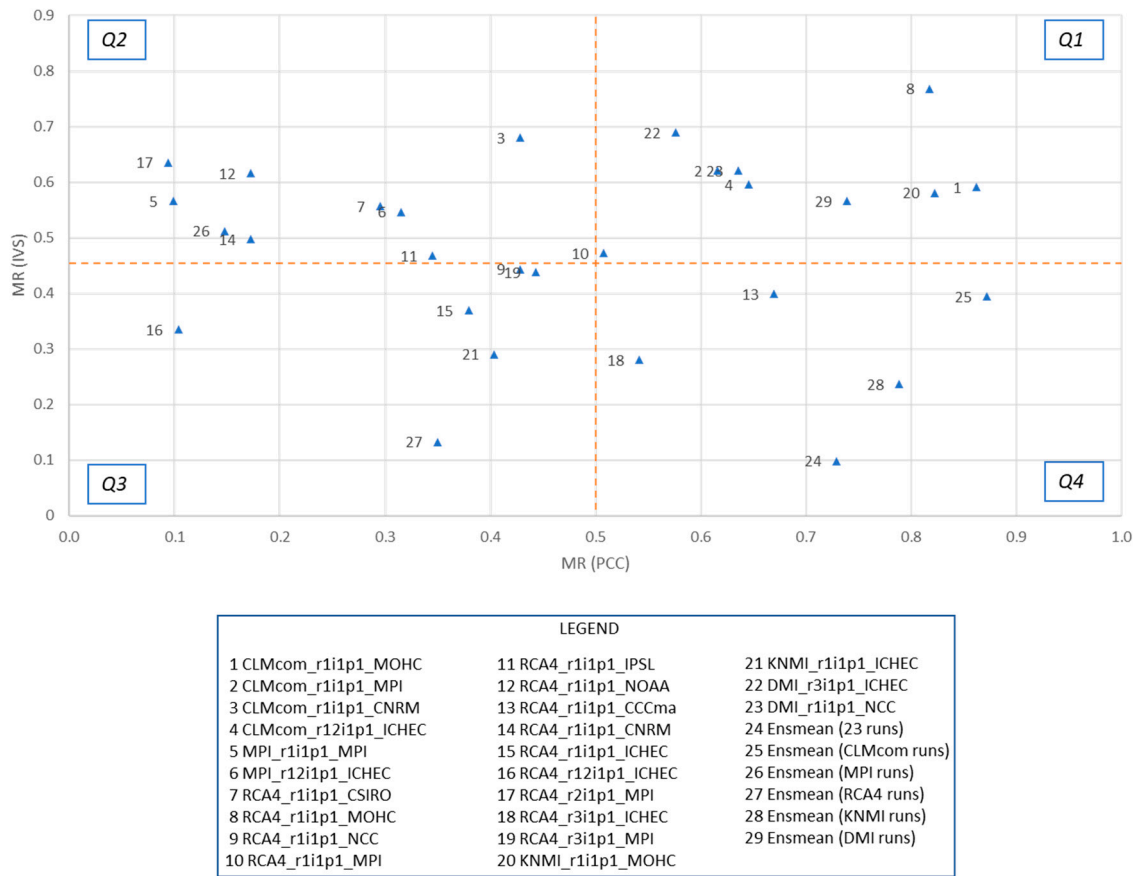

**Figure S4.** As in *Error! Reference source not found.* but for WAS region.

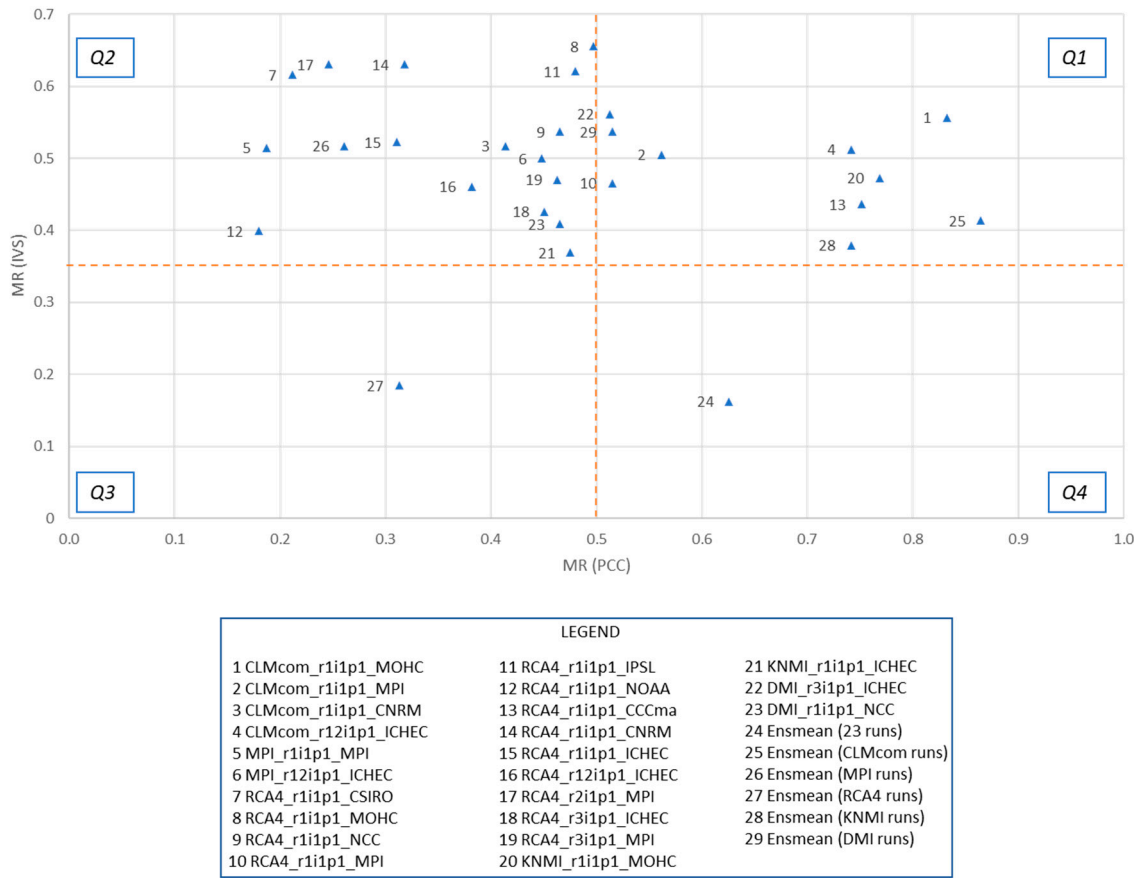

**Figure S5.** Model run ranking (relative to TAMSAT3) based on correlation coefficients (PCCs) and interannual variability scores (IVS), for both WAN and WAS region.

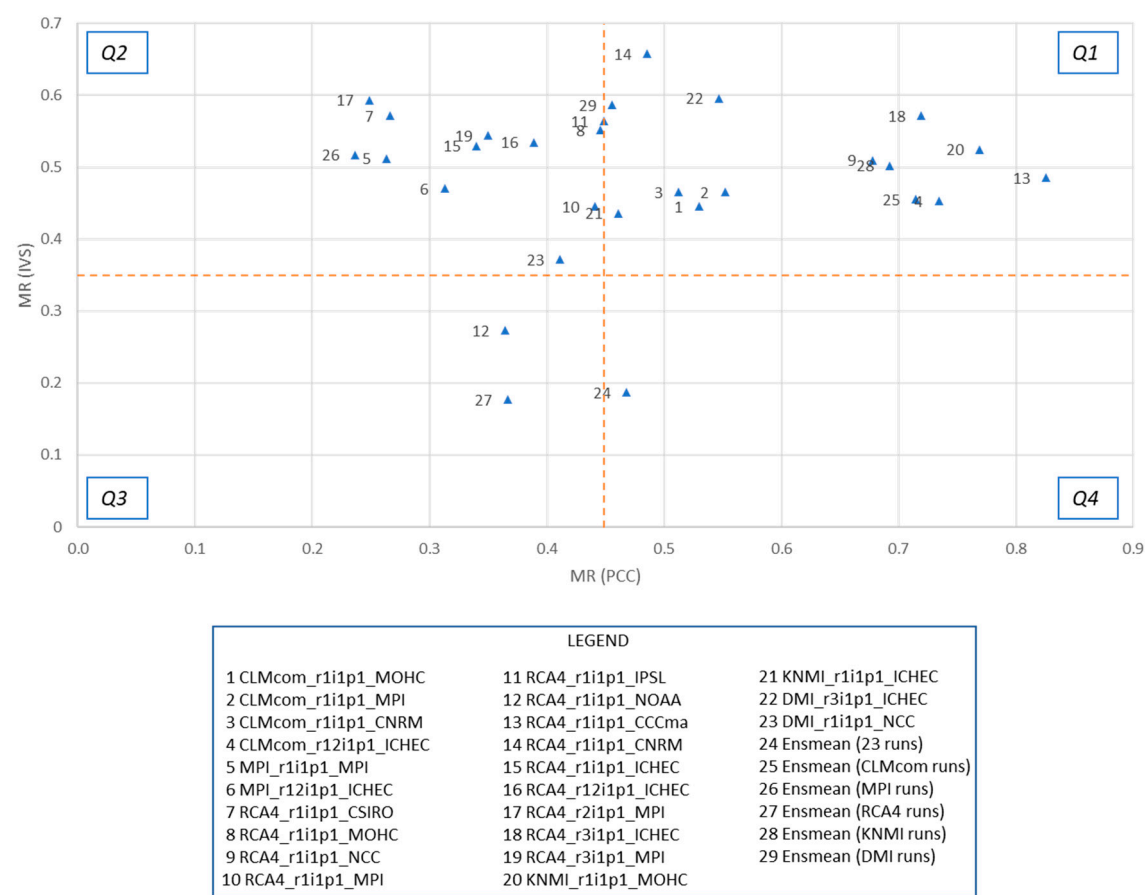

Figure S6. As in *Error! Reference source not found.* but relative to CHIRPS.
